# Supplementary material
Source: publisher site journal article supplement (https://www.spandidos-publications.com/7655/downloadSupplementary)

Figure S1. Flow diagram of patient recruitment in the present study.

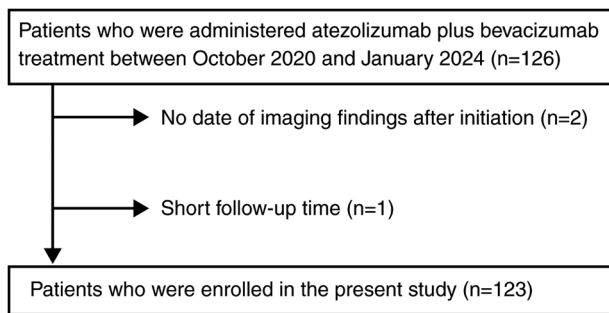

Figure S2. Patients meeting the 'drug-free', 'clinical CR' and 'drug-off' criteria in the present study. CR, complete response; AteBev, atezolizumab plus bevacizumab; TACE, transarterial chemoembolization.

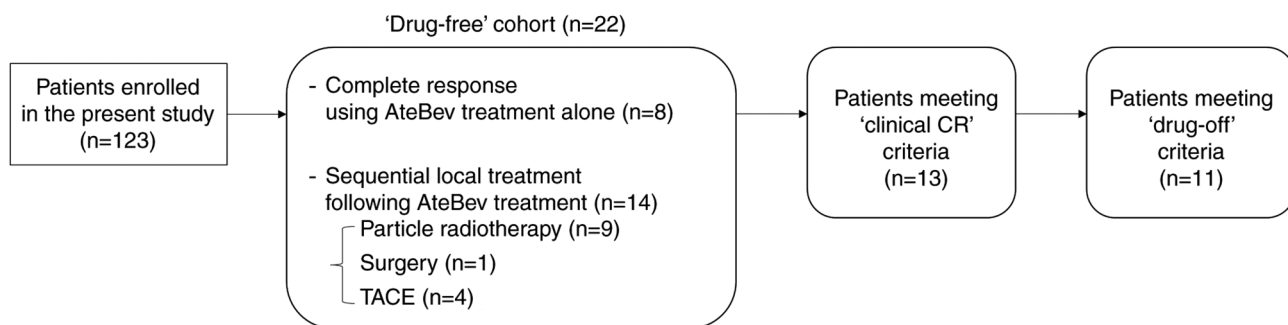

Supplement: Supplementary file 1 [file downloadSupplementary]
